# Supplementary material for: Photoluminescence of Eu(iii)-doped lamellar bridged silsesquioxanes self-templated through a hydrogen bonding array
Source: Royal Society of Chemistry journal article supplement (doi:10.1039/b807262k), 2008-01-01

# **Photoluminescence of Eu(III)-doped lamellar bridged silsesquioxanes self-templated through a hydrogen bonding array**

**Sónia S. Nobre, Carlos D. S. Brites, Rute A. S. Ferreira, Verónica de Zea Bermudez, Carole Carcel, Joël J. E. Moreau, J. Rocha, Michel Wong Chi Man and Luís D. Carlos**

## **Figure Captions**

**Fig. S1** – SEM images of the Eu@L12-1 (a) and Eu@L12-2 (b).

**Fig. S2** - Representative cross section profiles in different planes of the AFM image of Fig 2a.

**Fig. S3** - Carbon indexation of the L12 hybrid.

**Fig. S4** - Emission spectra (300K) of the Eu@L12-3 hybrid excited at (black) 310 nm, (red) 335 nm, (blue) 360 nm and (magenta) 393 nm.

**Fig. S5** - Decay curves of the Eu@L12 hybrids at low temperature, monitoring at 612 nm and exciting at 335-340 nm for the (red) Eu@L12-1, (green) Eu@L12-2 and (blue) Eu@L12-3 hybrids.

*Fig S1*

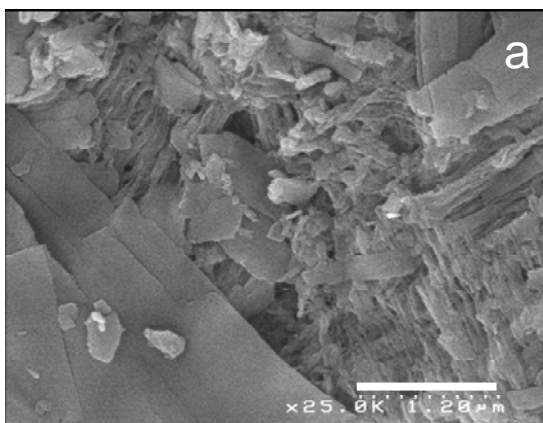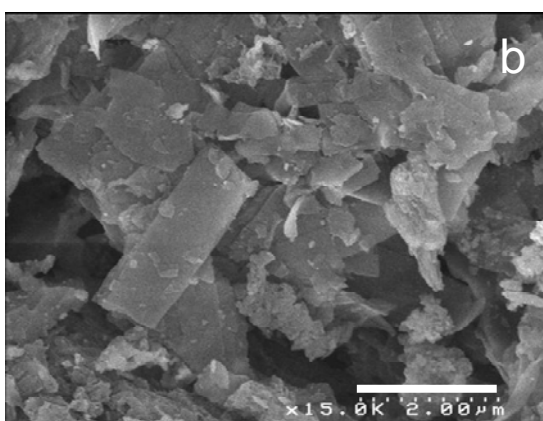

Fig S2

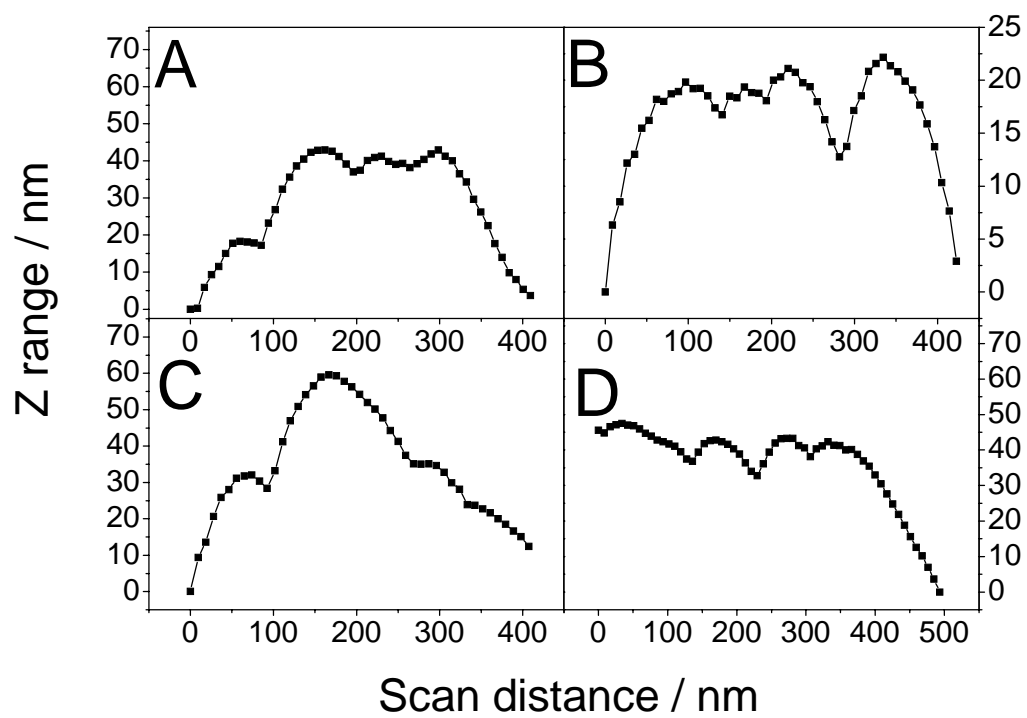

Fig. S3

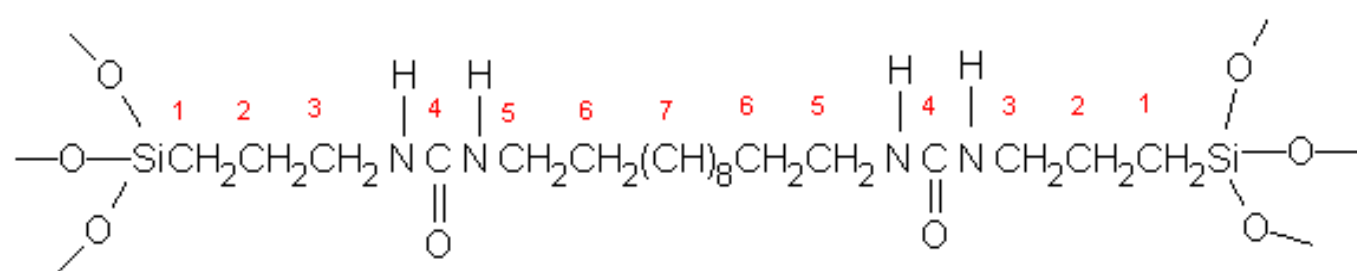

Fig S4

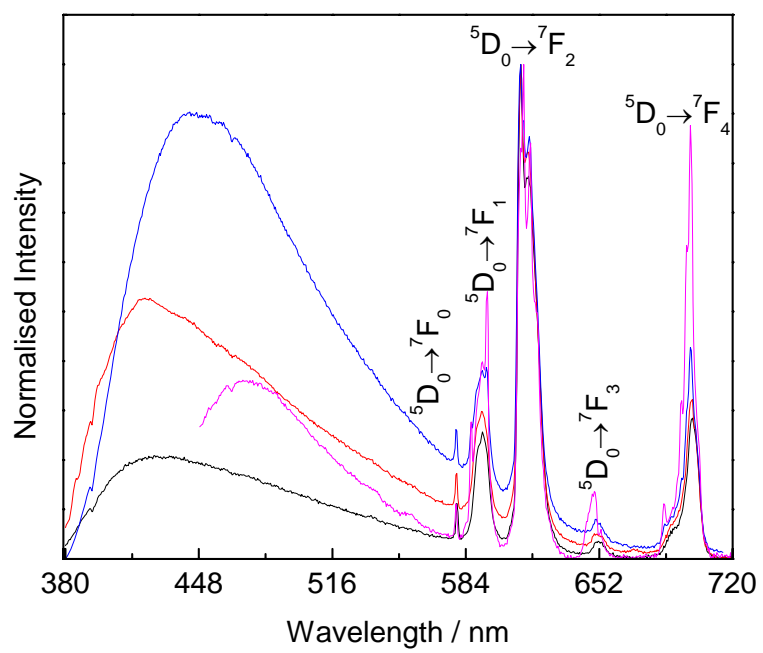

Fig S5

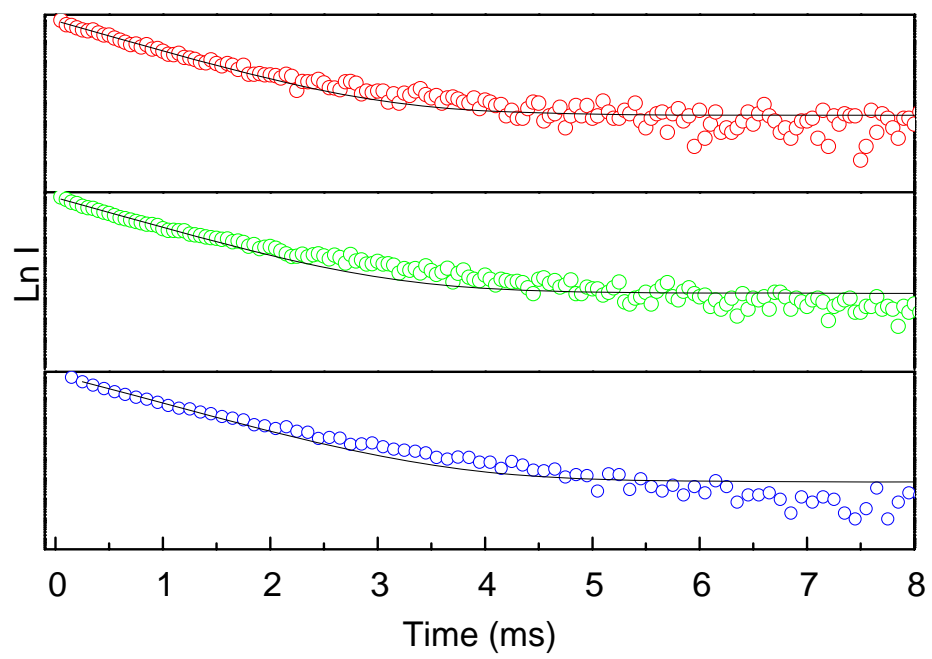

Supplement: b807262k.pdf [file b807262k.pdf]
